# Supplementary material
Source: PubMed Central journal article supplement (PMC298770)
Supplement: pnas_0335853100_6.pdf [file pnas_0335853100_6.pdf]

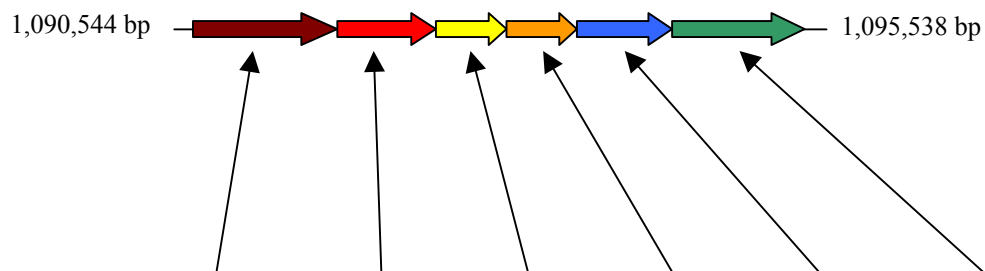

| ORF name                                | CTC1019                                             | CTC1020                                               | CTC1021                                               | CTC1022                          | CTC1023                          | CTC1024                                      |
|-----------------------------------------|-----------------------------------------------------|-------------------------------------------------------|-------------------------------------------------------|----------------------------------|----------------------------------|----------------------------------------------|
| Homologues in Nqr/Rnf systems           | NqrF/<br>RnfC                                       | NqrB/<br>RnfD                                         | NqrC/<br>RnfG                                         | NqrD/<br>RnfE                    | NqrE/<br>RnfA                    | -/<br>RnfB                                   |
| Hydrophobicity/<br>putative<br>location | cytosolic<br>enzyme                                 | 16 TM/<br>membrane-<br>integrale                      | 2 TM/<br>membrane-<br>associated                      | 10 TM/<br>membrane-<br>integrale | 12 TM/<br>membrane-<br>integrale | 2 TM/<br>membrane-<br>associated             |
| Redox domains                           | NAD/FMN-<br>binding<br>sites;<br>2Fe2S;<br>2[4Fe4S] | FMN-<br>binding<br>site<br>(together<br>with<br>NqrC) | FMN-<br>binding<br>site<br>(together<br>with<br>NqrB) |                                  |                                  | 4[4Fe4S]<br>“Methanogenic<br>Polyferredoxin” |
| Signal peptide                          | -                                                   | -                                                     | +                                                     | -                                | -                                | +                                            |
